# Supplementary material for: Long-term treatment with rilzabrutinib in patients with immune thrombocytopenia
Source: PubMed Central journal article supplement — Blood Adv. 2024 Feb 24;8(7):1715–24. doi: 10.1182/bloodadvances.2023012044 (PMC10997915; doi:10.1182/bloodadvances.2023012044), 2024-02-24
Supplement: BLOODA_ADV-2023-012044-mmc1.pdf [file BLOODA_ADV-2023-012044-mmc1.pdf]

**Long-term treatment with rilzabrutinib in patients with immune thrombocytopenia**  
David J. Kuter, et al.

**Supplemental Material**

**Supplemental Table 1. Additional platelet response endpoints in the LTE**

| <b>Platelet responses, n/n (%)</b>                                               | <b>All LTE patients (n = 16)</b> |
|----------------------------------------------------------------------------------|----------------------------------|
| $\geq 50 \times 10^9/L$ in $\geq 50\%$ of monthly visits*                        | 13/14 (93) <sup>†</sup>          |
| $\geq 50 \times 10^9/L$ in $\geq 50\%$ of quarterly visits in the last 12 months | 7/7 (100) <sup>†</sup>           |
| $\geq 100 \times 10^9/L$ at any point                                            | 13/16 (81)                       |

LTE, long-term extension.

\*Included patients with platelet count visits between LTE cycle 7, day 1 and LTE cycle 12, day 1.

<sup>†</sup>Denominator indicates the number of patients who have progressed far enough in the LTE to be eligible for monthly or quarterly visit assessments.
